# Supplementary material for: The GH receptor exon 3 deletion is a marker of male-specific exceptional longevity associated with increased GH sensitivity and taller stature
Source: PubMed Central journal article supplement — Sci Adv. 2017 Jun 16;3(6):e1602025. doi: 10.1126/sciadv.1602025 (PMC5473676; doi:10.1126/sciadv.1602025), 2017-06-16
Supplement: 1602025_SM.pdf [file 1602025_SM.pdf]

## Supplementary Materials for

### **The GH receptor exon 3 deletion is a marker of male-specific exceptional longevity associated with increased GH sensitivity and taller stature**

Danny Ben-Avraham, Diddahally R. Govindaraju, Temuri Budagov, Delphine Fradin, Peter Durda, Bing Liu, Sandy Ott, Danielle Gutman, Lital Sharvit, Robert Kaplan, Pierre Bougnères, Alex Reiner, Alan R. Shuldiner, Pinchas Cohen, Nir Barzilai, Gil Atzmon

Published 16 June 2017, *Sci. Adv.* **3**, e1602025 (2017)

DOI: 10.1126/sciadv.1602025

#### **This PDF file includes:**

- fig. S1. Phosphorylation of STAT5 and AKT in homozygous WT and *d3-GHR* transformed lymphocytes from male AJ centenarians.
- table S1. Analysis (allelic, dominant, additive, and recessive models) of various variables (means  $\pm$  SE), includes all AJs groups ( $n = 567$ ) and adjusted for gender, age, and group.
- table S2. Analysis (allelic, dominant, additive, and recessive) of various variables (means  $\pm$  SE), includes AJ centenarian (C) and control (C) groups ( $n = 344$ ) and adjusted for gender, age, and group.
- table S3. Groups analysis of various variables (means  $\pm$  SE) adjusted for gender and age within AJs.
- table S4. Analysis (allelic, dominant, additive, and recessive models) of various variables (means  $\pm$  SE), includes AJ offspring (O) and control (C) ( $n = 370$ ) and adjusted for gender, age, and group.
- table S5A. Genotyping efforts among the four cohorts ( $n = 841$ ): AJ ( $n = 567$ , 56% female), OOA 152 males, CHS 61 males, and FLLS 61 males.
- table S5B. Crude measurements of various variables (means  $\pm$  SE) in the three AJs ( $n = 567$ ) study groups.
- table S6. PCR procedure using primers.

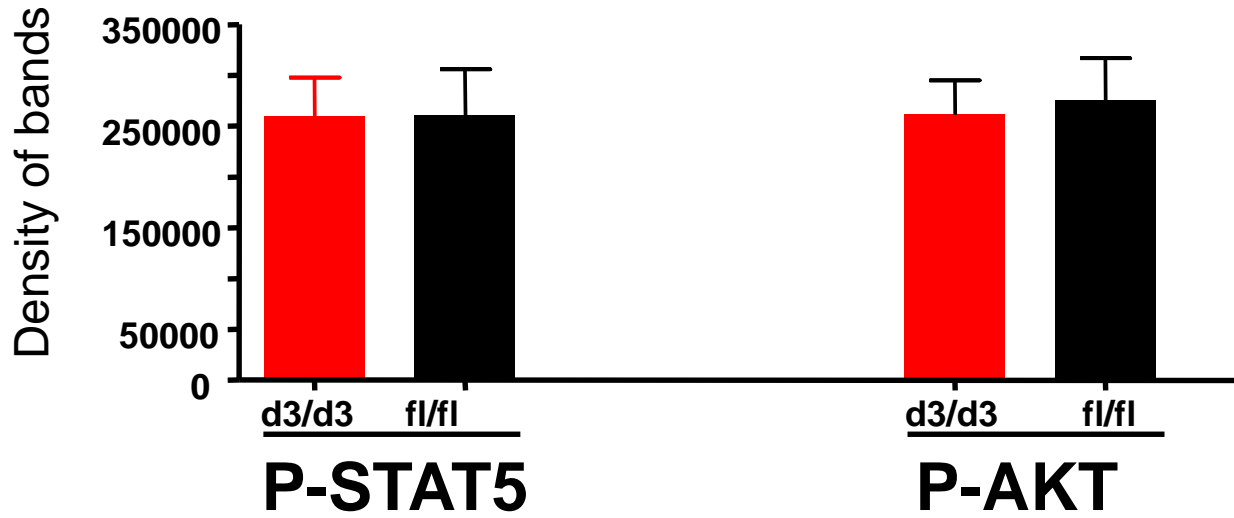

**fig. S1. Phosphorylation of STAT5 and AKT in homozygous WT and *d3-GHR* transformed lymphocytes from male AJ centenarians.** No effect on the phosphorylation of STAT5 and AKT, suggesting a unique, pathway-specific effect of the *d3-GHR* polymorphism on GH signaling with decreased constitutive activation but enhanced GH-driven signaling.

**table S1. Analysis (allelic, dominant, additive, and recessive models) of various variables (means  $\pm$  SE), includes all AJs groups ( $n = 567$ ) and adjusted for gender, age, and group.**

d3- Homozygote deletion, WT-Wild type, Het-Heterozygote, Pval- p value.

|                     | Allelic-O-C  |              |       | Dominant-O-C  |              |       | Additive-O-C |              |              |        | Recessive-O-C |              |       |
|---------------------|--------------|--------------|-------|---------------|--------------|-------|--------------|--------------|--------------|--------|---------------|--------------|-------|
|                     | d3           | None         | Pval  | Het and d3/d3 | WT           | Pval  | d3/d3        | Het          | WT           | Pval   | d3            | WT and Het   | Pval  |
| IGF-I (ng/ml)       | 123+/-4.27   | 134+/-2.96   | 0.052 | 123+/-4.57    | 138+/-5.09   | 0.03  | 122+/-11.3   | 123+/-5.05   | 139+/-5.13   | 0.10   | 125+/-11.2    | 130+/-3.61   | 0.67  |
| IGF-II (ng/ml)      | 794+/-29.8   | 806+/-20.4   | 0.79  | 789+/-33.6    | 821+/-36.4   | 0.98  | 834+/-86.8   | 782+/-35.6   | 821+/-36.5   | 0.78   | 834+/-86.2    | 800+/-25.7   | 0.49  |
| IGFBP-1 (ng/ml)     | 25.5+/-2.57  | 15.9+/-1.74  | 0.01  | 24.6+/-3.12   | 13.4+/-2.73  | 0.03  | 29.3+/-5.39  | 23+/-3.51    | 13.4+/-2.73  | 0.06   | 29.3+/-5.44   | 17.4+/-2.37  | 0.09  |
| IGFBP-2 (mg/dl)     | 13.8+/-0.98  | 13.1+/-0.67  | 0.97  | 13.5+/-1.1    | 13.2+/-1.14  | 0.99  | 15.6+/-2.39  | 12.9+/-1.22  | 13.2+/-1.14  | 0.99   | 15.6+/-2.39   | 13.1+/-0.84  | 0.93  |
| IGFBP-3 (ng/ml)     | 2449+/-59.1  | 2489+/-40.6  | 0.90  | 2433+/-65.5   | 2526+/-69.4  | 0.59  | 2539+/-149   | 2408+/-71.9  | 2526+/-69.4  | 0.60   | 2539+/-149    | 2470+/-50.9  | 0.52  |
| IGFBP-4 (ng/ml)     | 375+/-11.3   | 381+/-7.7    | 0.91  | 375+/-12.6    | 384+/-14     | 0.80  | 376+/-34.4   | 375+/-13.4   | 384+/-14.1   | 0.93   | 376+/-34.2    | 379+/-9.65   | 0.83  |
| IGF-I/IGFBP-3 ratio | 0.07+/-0.002 | 0.07+/-0.001 | 0.20  | 0.07+/-0.002  | 0.07+/-0.003 | 0.12  | 0.07+/-0.005 | 0.07+/-0.002 | 0.07+/-0.002 | 0.30   | 0.07+/-0.005  | 0.07+/-0.002 | 0.78  |
| GHBP (pM)           | 1011+/-32.6  | 1220+/-27.2  | 0.004 | 1041+/-34.3   | 1397+/-58.2  | 0.002 | 699+/-110    | 1078+/-35.6  | 1397+/-58.2  | 0.0008 | 699+/-110     | 1169+/-31.0  | 0.009 |
| Height (Inch)       | 66.5+/-0.16  | 66.4+/-0.1   | 0.47  | 66.3+/-0.17   | 66.5+/-0.18  | 0.89  | 67.3+/-0.42  | 66.1+/-0.19  | 66.5+/-0.18  | 0.11   | 67.3+/-0.42   | 66.3+/-0.13  | 0.05  |
| Weight (Pound)      | 151+/-1.44   | 152+/-0.97   | 0.62  | 151+/-1.56    | 152+/-1.66   | 0.68  | 153+/-3.93   | 150+/-1.70   | 152+/-1.66   | 0.87   | 153+/-3.93    | 151+/-1.20   | 0.66  |

**table S2. Analysis (allelic, dominant, additive, and recessive) of various variables (means  $\pm$  SE), includes AJ centenarian (C) and control (C) groups ( $n = 344$ ) and adjusted for gender, age, and group. d3- Homozygote deletion, WT-Wild type, Het-Heterozygote, Pval- p value.**

|                     | Allelic-C-C  |              |       | Dominant-C-C |             |       | Additive-C-C |              |              |      | Recessive-C-C |             |      |
|---------------------|--------------|--------------|-------|--------------|-------------|-------|--------------|--------------|--------------|------|---------------|-------------|------|
|                     | d3           | Het, WT      | Pval  | Het,d3/d3    | WT          | Pval  | d3/d3        | Het          | WT           | Pval | d3            | Het, WT     | Pval |
| IGF-I (ng/ml)       | 108+/-4.99   | 120+/-3.51   | 0.07  | 108+/-5.41   | 127+/-6.16  | 0.02  | 107+/-13.5   | 108+/-5.83   | 127+/-6.17   | 0.06 | 107+/-13.7    | 117+/-4.33  | 0.82 |
| IGF-II (ng/ml)      | 746+/-38.9   | 774+/-25.3   | 0.98  | 751+/-43.4   | 783+/-45.2  | 0.99  | 681+/-140    | 758+/-45     | 783+/-45.6   | 1.00 | 681+/-139     | 769+/-32.3  | 0.97 |
| IGFBP-1 (ng/ml)     | 33.7+/-5.44  | 23.3+/-4.06  | 0.13  | 32.3+/-7.65  | 21+/-6.05   | 0.39  | 38.7+/-9.74  | 29.8+/-8.35  | 21+/-6       | 0.28 | 38.7+/-9.46   | 24.7+/-5.79 | 0.11 |
| IGFBP-2 (mg/dl)     | 18.3+/-1.66  | 17.4+/-1.17  | 0.78  | 17.5+/-1.93  | 18+/-1.95   | 0.72  | 23.3+/-4.2   | 16.3+/-2.11  | 18+/-1.96    | 0.93 | 23.3+/-4.18   | 17.2+/-1.53 | 0.98 |
| IGFBP-3 (ng/ml)     | 2240+/-80.3  | 2339+/-58.6  | 0.64  | 2229+/-93.9  | 2402+/-96.6 | 0.42  | 2303+/-194   | 2213+/-102   | 2402+/-96.9  | 0.62 | 2303+/-193    | 2307+/-76.6 | 0.78 |
| IGFBP-4 (ng/ml)     | 420+/-14     | 415+/-8.99   | 0.88  | 419+/-15.4   | 414+/-16.4  | 0.61  | 443+/-55.3   | 417+/-15.3   | 414+/-16     | 0.13 | 443+/-55.1    | 416+/-11    | 0.07 |
| IGF-I/IGFBP-3 ratio | 0.06+/-0.003 | 0.07+/-0.002 | 0.38  | 0.06+/-3e-3  | 0.07+/-3e-3 | 0.20  | 0.06+/-0.01  | 0.06+/-0.003 | 0.07+/-0.003 | 0.38 | 0.06+/-0.01   | 0.07+/-2e-3 | 0.88 |
| GHBP (pM)           | 844+/-35.2   | 965+/-33.0   | 0.052 | 871+/-36.7   | 1102+/-86.5 | 0.006 | 556+/-122    | 902+/-38.2   | 1102+/-86.5  | 0.01 | 556+/-122     | 971+/-36.1  | 0.14 |
| TSH (mIU/l)         | 2.34+/-0.13  | 2.27+/-0.09  | 0.73  | 2.33+/-2.25  | 0.14+/-0.15 | 0.74  | 2.42+/-0.37  | 2.31+/-0.15  | 2.25+/-0.15  | 0.94 | 2.42+/-0.37   | 2.28+/-0.11 | 0.84 |
| Height (Inch)       | 66.2+/-0.21  | 66.4+/-0.14  | 0.97  | 66.1+/-0.23  | 66.6+/-0.24 | 0.46  | 67+/-0.6     | 65.9+/-0.25  | 66.6+/-0.24  | 0.22 | 67+/-0.6      | 66.3+/-0.17 | 0.19 |
| Weight (Pound)      | 143+/-1.68   | 144+/-1.14   | 0.60  | 143+/-1.82   | 145+/-1.97  | 0.75  | 143+/-4.69   | 143+/-1.95   | 145+/-1.97   | 0.78 | 143+/-4.68    | 144+/-1.42  | 0.49 |

**table S3. Groups analysis of various variables (means  $\pm$  SE) adjusted for gender and age within AJs. d3-Homozygote deletion, WT-Wild type, Het-Heterozygote, Pval- p value.**

|                     | Control (N=147) |             |      | Offspring (N=223) |             |      | Centenarian (N=197) |             |      |
|---------------------|-----------------|-------------|------|-------------------|-------------|------|---------------------|-------------|------|
|                     | d3              | WT and Het  | Pval | d3                | WT and Het  | Pval | d3                  | WT and Het  | Pval |
| IGF -1(ng/ml)       | 123+/-26.2      | 140+/-6.8   | 0.45 | 147+/-18.5        | 149+/-6.07  | 0.70 | 90.1+/-16.0         | 96.7+/-5.56 | 0.97 |
| IGF-II (ng/ml)      | 799+/-56.5      | 790+/-36.1  | 0.74 | 880+/-45.8        | 881+/-34.6  | 0.67 | 695+/-55.2          | 757+/-36.7  | 0.68 |
| IGFBP-1 (ng/ml)     | 6.36+/-4.55     | 8.31+/-2.07 | 0.59 | 15.8+/-2.53       | 8.75+/-1.59 | 0.01 | 37.1+/-4.31         | 28.7+/-3.25 | 0.12 |
| IGFBP-2 (mg/dl)     | 3.83+/-0.53     | 4.8+/-0.32  | 0.60 | 6.94+/-0.61       | 6.84+/-0.42 | 0.67 | 25.4+/-2.33         | 25.8+/-1.68 | 0.90 |
| IGFBP-3 (ng/ml)     | 2660+/-126      | 2586+/-81.2 | 0.61 | 2736+/-94.4       | 2676+/-62.3 | 0.71 | 2034+/-86.4         | 2192+/-62.2 | 0.31 |
| IGFBP-4 (ng/ml)     | 347+/-17.8      | 321+/-11.7  | 0.75 | 306+/-17.9        | 309+/-13.5  | 0.70 | 503+/-20.7          | 514+/-13    | 0.61 |
| IGF-I/IGFBP-3 ratio | 0.07+/-4e-3     | 0.07+/-2e-3 | 0.94 | 0.07+/-3e-3       | 0.07+/-2e-3 | 0.44 | 0.06+/-3e-3         | 0.06+/-2e-3 | 0.23 |
| GHBP (pM)           | 1137+/-274      | 1224+/-67.8 | 0.91 | 906+/-194         | 1447+/-50.8 | 0.02 | 297+/-111           | 689+/-34.9  | 0.01 |
| Height (Inch)       | 67.5+/-1.08     | 67.8+/-0.26 | 0.93 | 67.7+/-0.57       | 66.4+/-0.18 | 0.21 | 66.8+/-0.7          | 64.7+/-0.23 | 0.05 |
| Weight (Pound)      | 170+/-10.2      | 167+/-2.42  | 0.69 | 166+/-6.7         | 162+/-2.13  | 0.95 | 133+/-4.63          | 125+/-1.56  | 0.41 |

**table S4. Analysis (allelic, dominant, additive, and recessive models) of various variables (means  $\pm$  SE), includes AJ offspring (O) and control (C) ( $n = 370$ ) and adjusted for gender, age, and group. d3- Homozygote deletion, WT-Wild type, Het-Heterozygote, Pval- p value.**

|                 | Allelic-O-C  |              |      | Dominant-O-C  |             |      | Additive-O-C |              |              |      | Recessive-O-C |              |      |
|-----------------|--------------|--------------|------|---------------|-------------|------|--------------|--------------|--------------|------|---------------|--------------|------|
|                 | d3           | Het and WT   | Pval | Het and d3/d3 | N/N         | Pval | d3/d3        | Het          | WT           | Pval | d3            | He and WT    | Pval |
| IGF-I(ng/ml)    | 142+/-5.51   | 146+/-3.72   | 0.43 | 143+/-5.97    | 148+/-6.4   | 0.51 | 141+/-15.1   | 143+/-6.46   | 148+/-6.41   | 0.71 | 141+/-15.1    | 146+/-4.61   | 0.49 |
| IGF-II (ng/ml)  | 843+/-35.8   | 831+/-24.7   | 0.55 | 830+/-40.6    | 842+/-44.8  | 0.71 | 949+/-113    | 815+/-43     | 842+/-44.9   | 0.68 | 949+/-112     | 827+/-31.3   | 0.38 |
| IGFBP-1 (ng/ml) | 14.7+/-2.54  | 8.66+/-1.64  | 0.02 | 14.9+/-3.02   | 6.84+/-2.44 | 0.01 | 13.9+/-5.31  | 15.3+/-3.44  | 6.84+/-2.47  | 0.04 | 13.9+/-5.61   | 9.84+/-2.35  | 0.50 |
| IGFBP-2 (mg/dl) | 5.98+/-0.46  | 6.12+/-0.31  | 0.94 | 5.65+/-0.51   | 6.54+/-0.52 | 0.59 | 7.8+/-1.18   | 5.17+/-0.56  | 6.54+/-0.52  | 0.36 | 7.8+/-1.18    | 5.9+/-0.38   | 0.29 |
| IGFBP-3 (ng/ml) | 2712+/-77.5  | 2648+/-52.5  | 0.51 | 2683+/-85.7   | 2650+/-89.1 | 0.73 | 2883+/-204   | 2643+/-93.1  | 2650+/-89.2  | 0.66 | 2883+/-203    | 2646+/-66.1  | 0.37 |
| IGFBP-4 (ng/ml) | 324+/-13.7   | 316+/-9.62   | 0.58 | 322+/-15.5    | 313+/-17.8  | 0.76 | 343+/-43.1   | 320+/-16.5   | 313+/-17.9   | 0.68 | 343+/-42.7    | 317+/-12.1   | 0.38 |
| IGF/BP3 ratio   | 0.07+/-0.002 | 0.07+/-0.002 | 0.55 | 0.07+/-3e-3   | 0.07+/-3e-3 | 0.78 | 0.07+/-0.01  | 0.07+/-0.003 | 0.07+/-0.003 | 0.70 | 0.07+/-0.01   | 0.07+/-0.002 | 0.40 |
| GHBP (pM)       | 1238+/-45.1  | 1405+/-35.7  | 0.02 | 1261+/-47.3   | 1518+/-71.4 | 0.01 | 977+/-157    | 1288+/-49.0  | 1518+/-71.4  | 0.01 | 977+/-157     | 1366+/-41.0  | 0.04 |
| Height (Inch)   | 67.2+/-0.19  | 67+/-0.12    | 0.45 | 67.2+/-0.2    | 66.9+/-0.2  | 0.66 | 67.7+/-0.52  | 67.1+/-0.22  | 66.9+/-0.2   | 0.59 | 67.7+/-0.52   | 67+/-0.15    | 0.31 |
| Weight (Pound)  | 166+/-2.00   | 164+/-1.30   | 0.69 | 166+/-2.16    | 163+/-2.21  | 0.66 | 167+/-5.62   | 165+/-2.32   | 163+/-2.21   | 0.91 | 167+/-5.62    | 164+/-1.62   | 0.89 |

**table S5A. Genotyping efforts among the four cohorts ( $n = 841$ ): AJ ( $n = 567$ , 56% female), OOA 152 males, CHS 61 males, and FLLS 61 males.**

|                                   | Entire Cohort |    |           | Genotyped reported Individuals |    |           |
|-----------------------------------|---------------|----|-----------|--------------------------------|----|-----------|
|                                   | N             | %F | Age range | N                              | %F | Age range |
| Ashkenazi Jews (AJ)               | 567           | 56 | 43-109    | 567                            | 56 | 43-109    |
| Old Order Amish (OOA)             | 1078          | 59 | 25-98     | 152                            | 0  | 21-85     |
| Cardiovascular Health Study (CHS) | 5888          | 57 | 64-98     | 61                             | 0  | 75-95     |
| French Long Lived Study (FLLS)    | 706           | 0  | 34-110    | 61                             | 0  | 70-109    |

**table S5B. Crude measurements of various variables (means  $\pm$  SE) in the three AJs ( $n = 567$ ) study groups.**

|                     | Control (N=147)   | Offspring (N=223) | Centenarian (N=197) |
|---------------------|-------------------|-------------------|---------------------|
| Age at recruitment  | 71+/-0.71         | 68.4+/-0.52       | 97.6+/-0.23         |
| % of female (N)     | 36(53)            | 51(114)           | 48 (95)             |
| IGF-I (ng/ml)       | 139+/-6.45(121)   | 149+/-5.99(194)   | 96+/-5.24(138)      |
| IGF-II (ng/ml)      | 920+/-23(71)      | 952+/-21.2(86)    | 846+/-24.5(57)      |
| IGFBP-1 (ng/ml)     | 14.2+/-2.24(25)   | 11.8+/-1.44(70)   | 30.1+/-2.58(66)     |
| IGFBP-2 (mg/dl)     | 6.76+/-0.81(96)   | 6.13+/-0.35(158)  | 24.2+/-1.45(127)    |
| IGFBP-3 (ng/ml)     | 2610+/-59.4(109)  | 2733+/-51(197)    | 2157+/-54.9(157)    |
| IGF-I/IGFBP-3 ratio | 0.07+/-0.002(109) | 0.07+/-0.002(197) | 0.06+/-0.002(157)   |
| IGFBP-4 (ng/ml)     | 375+/-10.1(72)    | 357+/-9.95(86)    | 515+/-10.5(57)      |
| GHBP (pM)           | 1220+/-64.8(78)   | 1413+/-52.8(140)  | 651+/-35.9(93)      |
| Height (Inch)       | 67.8+/-0.33(141)  | 66.5+/-0.28(200)  | 64.9+/-0.3(150)     |
| Weight (Pound)      | 167+/-2.74(143)   | 163+/-2.35(218)   | 126+/-1.88(184)     |

**table S6. PCR procedure using primers.**

| Primer | Sequence                    |
|--------|-----------------------------|
| G1     | 5'-TGTGCTGGTCTGTTGGTCTG     |
| G2     | 5'-AGTCGTTCCCTGGGACAGAGA    |
| G3     | 5'-CCTGGATTAACACTTTGCAGACTC |
